# Supplementary material for: Photochemical preparation of Cd/CdS photocatalysts and their efficient photocatalytic hydrogen production under visible light irradiation
Source: Royal Society of Chemistry journal article supplement (doi:10.1039/c3gc42466a), 2014-01-01
Supplement: c3gc42466a1.pdf [file c3gc42466a1.pdf]

## Supplementary material

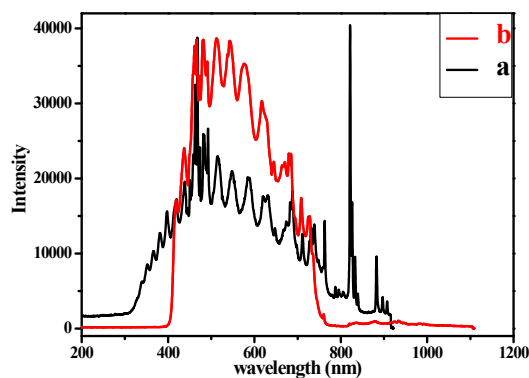

Fig.S1 The spectrum of Xenon lamp(a)and with a filter(b);

Fig.S1 shows the spectrum of Xenon lamp. After adding an optical filter (0.1 M  $\text{NaNO}_2$  aqueous solution), Fig. 3A(b) shows the spectrum in the range from 400 nm to 750 nm.
